# Supplementary material for: A High Throughput Genetic Screen Identifies New Early Meiotic Recombination Functions in Arabidopsis thaliana
Source: PLoS Genet. 2009 Sep 18;5(9):e1000654. doi: 10.1371/journal.pgen.1000654 (PMC2735182; doi:10.1371/journal.pgen.1000654)
Supplement: Table S1 — Molecular characterisation of cloned mutations. (0.04 MB XLS) [file pgen.1000654.s004.xls]

## Sheet: Feuil1
Line	allele	ecotype	origin	type of mutagenesis	type of mutation	Primer forward (Pfwd)	Pfwd sequence	Primer reverse (Prev)	Prev sequence	Sequence of Pfwd/Prev PCR product in wild type	Sequence of Pfwd/Prev PCR product in mutant
E19-68	Atprd2-1	Col-0	EMS	EMS	1 bp modified	pPRD2_5	ATAGATTTTCTCCTGGAACTG	pPRD2_6	AGTAGATGCTAACCTGGAAAG	ATAGATTTTCTCCTGGAACTGTCTGAAGCAGACTCCAATGTTAGGCTTTG TTGCTTAAGTTTTTTTCTGGTAATATGCACGCACTCTTAAATGCTTTGCA ACTCTGAACTTGCTTCTTATATTCTGCAGGACTCTAACTTCAGCAATTGG TCACATCAGGCTGTAGATTTCATATTCGGTAATATTATTCAAAGTTCCCG AGTTGCAAACAAATTATTTAAGTCCTGAGCTGCATTTCCTTTAATATAAA CCTGGTTTGCACTTATGAATTAATGCTCTGTTTGGCATACTCAAGCTTCA CTGAAGAAGTTAATATCGATGGGAAGGAACTTAGAATCTGTTGAAGAATC TATCAGCTTCATGATTACACAGTTGATCACAAGAATGTGCAC…	ATAGATTTTCTCCTGGAACTGTCTGAAGCAGACTCCAATGTTAGGCTTTG TTGCTTAAGTTTTTTTCTGGTAATATGCACGCACTCTTAAATGCTTTGCA ACTCTGAACTTGCTTCTTATATTCTGCAGGACTCTAACTTCAGCAATTGa TCACATCAGGCTGTAGATTTCATATTCGGTAATATTATTCAAAGTTCCCG AGTTGCAAACAAATTATTTAAGTCCTGAGCTGCATTTCCTTTAATATAAA CCTGGTTTGCACTTATGAATTAATGCTCTGTTTGGCATACTCAAGCTTCA CTGAAGAAGTTAATATCGATGGGAAGGAACTTAGAATCTGTTGAAGAATC TATCAGCTTCATGATTACACAGTTGATCACAAGAATGTGCAC…
EKT10	Atprd2-2	Ws-4	INRA	T-DNA	1 bp modified	pPRD2_5	ATAGATTTTCTCCTGGAACTG	pPRD2_6	AGTAGATGCTAACCTGGAAAG	ATAGATTTTCTCCtGGAACTGTCtGAAGCAGaCTccaAtgttAGGCTttg ttgcttAAGTTTTTTTCTGGTAATATGCACGCACTCTTAAATGCTTTGCA ACTCTGAACTTGCTTCTTATATTCTGCAGGACTCTAACTTCAGCAATTGG TCACATCAGGCTGTAGATTTCatATTCGGTAATATTATTCAAAGTTCCCG AGTTGCAAACAAATTATTTAAGTCCTGAGCTGCATTTCCTTTAATATAAG CCTGGTTTGCACTTATGAATTAATGCTCTGTTTGGCATACTCAAGCTTCA CTGAAGAAGTTAATATCGATGGGAAGGAACTTAGAATCTGTTGAAGAATC TATCAGCTTCATGATTACACAGTTGATCACAAGAATGTGCAC…	TATTATTCAAAGTTCCCGAGTTGCAAACAAATTATTTAAGTCCTGAGCTG CATTTCCTTTAATATAAGCCTGGTTTGCACTTATGAATTAATGCTCTGTT TGGCATACTCAAGCTTCACTGAAGAAGTTAATATCGATGGGAAGGAACTT AGAATCTGTTGAAGAATCTATCAGCTTCATGATTACACAGTTGATCACAA GAATGTGCACTCCCTTCAAAGGAAATGGTAACTTCAGCAGTTTAATAATG ATTCTAACTGTGTTTTCCTTCCTAATTATCATTTTTCTACGATTTGTTTT CCTTCACCATCTGTTTTAGAGGTGAAACAACTAGAAACAAGTGTTGGGTT TTATGTCCAACATTTGATCCGTAAACTTGGAAGTGAACCATT…
EAN68	Atprd2-3	Ws-4	INRA	T-DNA	T-DNA tagged	pPRD2_6	AGTAGATGCTAACCTGGAAAG	TAG5	CTACAAATTGCCTTTTCTTATCGAC		LB FST: ATAACCCACAGGTCCCAGGATCGAAACCTGGCTCTGATAGAGTTTT
EXX73	Atprd2-4	Ws-4	INRA	T-DNA	Whole gene deleted	pPRD2_5	ATAGATTTTCTCCTGGAACTG	pPRD2_6	AGTAGATGCTAACCTGGAAAG	ATAGATTTTCTCCtGGAACTGTCtGAAGCAGaCTccaAtgttAGGCTttg ttgcttAAGTTTTTTTCTGGTAATATGCACGCACTCTTAAATGCTTTGCA ACTCTGAACTTGCTTCTTATATTCTGCAGGACTCTAACTTCAGCAATTGG TCACATCAGGCTGTAGATTTCatATTCGGTAATATTATTCAAAGTTCCCG AGTTGCAAACAAATTATTTAAGTCCTGAGCTGCATTTCCTTTAATATAAG CCTGGTTTGCACTTATGAATTAATGCTCTGTTTGGCATACTCAAGCTTCA CTGAAGAAGTTAATATCGATGGGAAGGAACTTAGAATCTGTTGAAGAATC TATCAGCTTCATGATTACACAGTTGATCACAAGAATGTGCAC…	no amplification
						pPRD2_13	ATGAGTTCAAGCGTAGCTG	pPRD2_11	CAACAGATTCTAAGTTCCTTCCC	TGAATTTGAtGCACTTCGCtGGAAGCAGAAGGTGAAACTTCTCGATTTTT TTATTTTTTTTTTTGCATTTGGTTTTAATGgCCTTCTCGTTGCGAACTAT CTgATATAtataTcTGGTgaaaTCTACGaATTcTaGGCTACATTTCGATT TCTGTTCTTCGTTTAGAaATCTAGgTCAGCTCTAATTGTTGCGAGACGGA GGTTCTAACATAGTGAGATTTTCGATTTTGAAATTAGGCTAAAGAGAGGA AGAAAGAGATTATCAGACTCCAGGAAGATCTCAAGGATGCTGAAAGTATT TTTTTCCGCCTCTCTTAACTTTTGCAAAAATTCGTTTCTGTATTTATTGA TTCTTAAAATGGAAAGGCTGCAAGATGTTTCTAGAACTGATT…	no amplification
						pPRD2_13	ATGAGTTCAAGCGTAGCTG	pPRD2_6	AGTAGATGCTAACCTGGAAAG	TGAATTTGAtGCACTTCGCtGGAAGCAGAAGGTGAAACTTCTCGATTTTT TTATTTTTTTTTTTGCATTTGGTTTTAATGgCCTTCTCGTTGCGAACTAT CTgATATAtataTcTGGTgaaaTCTACGaATTcTaGGCTACATTTCGATT TCTGTTCTTCGTTTAGAaATCTAGgTCAGCTCTAATTGTTGCGAGACGGA GGTTCTAACATAGTGAGATTTTCGATTTTGAAATTAGGCTAAAGAGAGGA AGAAAGAGATTATCAGACTCCAGGAAGATCTCAAGGATGCTGAAAGTATT TTTTTCCGCCTCTCTTAACTTTTGCAAAAATTCGTTTCTGTATTTATTGA TTCTTAAAATGGAAAGGCTGCAAGATGTTTCTAGAACTGATT…	no amplification
FCE21	Atprd2-5	Ws-4	INRA	T-DNA	1 bp added	pPRD2_5	ATAGATTTTCTCCTGGAACTG	pPRD2_6	AGTAGATGCTAACCTGGAAAG	ATAGATTTTCTCCtGGAACTGTCtGAAGCAGaCTccaAtgttAGGCTttg ttgcttAAGTTTTTTTCTGGTAATATGCACGCACTCTTAAATGCTTTGCA ACTCTGAACTTGCTTCTTATATTCTGCAGGACTCTAACTTCAGCAATTGG TCACATCAGGCTGTAGATTTCatATTCGGTAATATTATTCAAAGTTCCCG AGTTGCAAACAAATTATTTAAGTCCTGAGCTGCATTTCCTTTAATATAAG CCTGGTTTGCACTTATGAATTAATGCTCTGTTTGGCATACTCAAGCTTCA CTGAAGAAGTTAATATCGATGGGAAGGAACTTAGAATCTGTTGAAGAATC TATCAGCTTCATGATTACACAGTTGATCACAAGAATGTGCAC…	ATAGATTTTCTCCtGGAACTGTCtGAAGCAGaCTccaAtgttAGGCTttg ttgcttAAGTTTTTTTCTGGTAATATGCACGCACTCTTAAATGCTTTGCA ACTCTGAACTTGCTTCTTATATTCTGCAGGACTCTAACTTCAGCAATTGG TCACATCAGGCTGTAGATTTCatATTCGGTAATATTATTCAAAGTTCCCG AGTTGCAAACAAATTATTTAAGTCCTGAGCTGCATTTCCTTTAATATAAG CCTGGTTTGCACTTATGAATTAATGCTCTGTTTGGCATACTCAAGCTTCA CTGAAGAAGTTAATATCGATGGGAAGGAACTTAGAATCTGTTGAAGAATC TATCAGCTTCATGATTACACAGTTTGATCACAAGAATGTGCA…
EFB36	Atprd3-1	Ws-4	INRA	T-DNA	1 bp modified	pPRD3-P3	GGTTTCAGTTCTCTCACTCT	pPRD3-P4	CTGCTGAAGTGAAGTGTCTTG	GGGTAGTGAGATCTTGGGTGATGAAGATGAATATCAACAAAGCCTGCGAT CTGAAATCTATTTCTGTCTTTCCTCCTAATTTAAGGTGCCATCTCGCTTC TCTCCGTATCTCTCTCTTTCAGAATTTGATTTGAGATTACACTGCGATTT CCATCGTTTAGGTTTTTTGTTTTGTTCCGAATCTGGTTTGTGACTGGAGA CGAGTGTCAGTTGATCTGTATGTGGACATTGTTTTTGATCTATTACCAAC TAATCTATAGCTTCCCAGGAGAATCCATTAGGGTTTTGGCTACTGATAAT GTTTTCTCTTTGGAATTAGAAGGAGATCAGCAGAACCACAAGCATCTCAG CAGCTTCGATCTCAACAGTCACAGCAGTCCTTCTCTCAGGGA…	CTGAAATCTATTTCTGTCTTTCCTCCTAATTTAAGGTGCCATCTCGCTTC TCTCCGTATCTCTCTCTTTCAGAATTTGATTTGAGATTACACTGCGATTT CCATCGTTTAGGTTTTTTGTTTTGTTCCGAATCTGGTTTGTGACTGGAGA CGAGTGTCAGTTGATCTGTATGTGGACATTGTTTTTGATCTATTACCAAC TAATCTATAGCTTCCCAGGAGAATCCATTAGGGTTTTGGCTACTGATAAT GTTTTCTCTTTGGAATTAGAAGGAGATCAGCAGAACCACAAGCATCTCAG CAGCTTCGATCTCAACAGTCACAGCAGTCCTTCTCTCAGGGACCTTCTTC GTCTCAGCGTGGTTGTGGTGGTTTTTCTCAGATGACTCAGAG…
ECH20	Atprd3-2	Ws-4	INRA	T-DNA	7 bp deleted	pPRD3-P3	GGTTTCAGTTCTCTCACTCT	pPRD3-P4	CTGCTGAAGTGAAGTGTCTTG	GGGTAGTGAGATCTTGGGTGATGAAGATGAATATCAACAAAGCCTGCGAT CTGAAATCTATTTCTGTCTTTCCTCCTAATTTAAGGTGCCATCTCGCTTC TCTCCGTATCTCTCTCTTTCAGAATTTGATTTGAGATTACACTGCGATTT CCATCGTTTAGGTTTTTTGTTTTGTTCCGAATCTGGTTTGTGACTGGAGA CGAGTGTCAGTTGATCTGTATGTGGACATTGTTTTTGATCTATTACCAAC TAATCTATAGCTTCCCAGGAGAATCCATTAGGGTTTTGGCTACTGATAAT GTTTTCTCTTTGGAATTAGAAGGAGATCAGCAGAACCACAAGCATCTCAG CAGCTTCGATCTCAACAGTCACAGCAGTCCTTCTCTCAGGGA…	GGGTAGTGAGATCTTGGGTGATGAAGATGAATATCAACAAAGCCTGCGAT CTGAAATCTATTTCTGTCTTTCCTCCTAATTTAAGGTGCCATCTCGCTTC TCTCCGTATCTCTCTCTTTCAGAATTTGATTTGAGATTACACTGCGATTT CCATCGTTTAGGTTTTTTGTTTTGTTCCGAATCTGGTTTGTGACTGGAGA CGAGTGTCAGTTGATCTGTATGTGGACATTGTTTTTGATCTATTACCAAC TAATCTATAGCTTCCCAGGAGAATCCATTAGGGTTTTGGCTACTGATAAT GTTTTCTCTTTGGAATTAGAAGGAGATCAGCAGAACCACAAGCATCTCAG CAGCTTCGATCTCAACAGTCACAGCAGTCCTTCTCTCAGGGA…
GABI677D06	Atprd3-3	Col-0	GABI	T-DNA	T-DNA tagged	pPRD3-P3	GGTTTCAGTTCTCTCACTCT	LbGABI	CCCATTTGGACGTGAATGTAGACAC		available at http://www.GABI-Kat.de
GABI357H01	Atprd3-4	Col-0	GABI	T-DNA	T-DNA tagged	pPRD3-P5	TCTTCTGTTTACTGCAGCTGA	LbGABI	CCCATTTGGACGTGAATGTAGACAC		available at http://www.GABI-Kat.de
DZT29	Atprd3-5	Ws-4	INRA	T-DNA	5' gene deleted	pPRD3-P3	GGTTTCAGTTCTCTCACTCT	pPRD3-P4	CTGCTGAAGTGAAGTGTCTTG	ATTACCAAC TAATCTATAGCTTCCCAGGAGAATCCATTAGGGTTTTGGCTACTGATAAT GTTTTCTCTTTGGAATTAGAAGGAGATCAGCAGAACCACAAGCATCTCAG CAGCTTCGATCTCAACAGTCACAGCAGTCCTTCTCTCAGGGACCTTCTTC GTCTCAGCGTGGTTGTGGTGGTTTTTCTCAGATGACTCAGAGTTCTGTCG ACGAACTCCTCATTAACGATCAGGTTTGCTACTTAGCTATAGATCGTCTC TTCTTCTGAAGAAGGCAAGTTAGATTTTAAGCTATTATTGATTTCATATT TCTGTGCTTGCTTTTCCTTTTTCACAGAGATTTAGTTCTCAGGAAAGAGA TCTCTCTTTGAAGAAGGTTAGTAGTTGCTTAC…	no amplification
Table S1: Molecular characterisation of cloned mutations
EMS= EMS mutagenesied seeds as described in Grelon et al. 2001
INRA=INRA-Versailles Genomic Resource Center
GABI=GABI Kat stock center http://www.gabi-kat.de/
